# Supplementary material
Source: HighWire-hosted journal article supplement (https://dmd.aspetjournals.org/highwire/filestream/65970/field_highwire_adjunct_files/3/DMD35113Sup_table3.pdf)
Supplement: DMD35113Sup_table3.pdf [file DMD35113Sup_table3.pdf]

## **Drug Metabolism and Disposition**

### **A PREDICTIVE LIGAND-BASED BAYESIAN MODEL FOR HUMAN DRUG INDUCED LIVER INJURY**

Sean Ekins, Antony J. Williams and Jinghai J. Xu

Collaborations in Chemistry, 601 Runnymede Avenue, Jenkintown, PA 19046, U.S.A. (SE)

Department of Pharmaceutical Sciences, University of Maryland, MD 21201, U.S.A. (SE)

Department of Pharmacology, University of Medicine & Dentistry of New Jersey (UMDNJ)-Robert Wood Johnson Medical School,  
675 Hoes Lane, Piscataway, NJ 08854. (SE)

Royal Society of Chemistry, 904 Tamaras Circle, Wake Forest, NC-27587. (AJW)

Merck & Co., Inc., 126 E. Lincoln Ave, Rahway, NJ 07065. (JJX)

**Supplemental Table 3. Compounds greater than 70% similar to training set. False =DILI negative (0), True = DILI Positive (1).**

| Compound Name   | Human DILI Bin  |                          | DILI Bayesian score | DILI Bayesian Closest Similarity | DILI Bayesian Closest Sample | True Positive | True Negative | False Positive | False Negative |
|-----------------|-----------------|--------------------------|---------------------|----------------------------------|------------------------------|---------------|---------------|----------------|----------------|
|                 | DILI Prediction | (1=positive; 0=negative) |                     |                                  |                              |               |               |                |                |
| Streptomycin    | FALSE           | 0                        | -45.49              | 0.97                             | Sample 264                   |               | 1             |                |                |
| Quinine Sulfate | TRUE            | 1                        | 30.57               | 0.96                             | Sample 251                   | 1             |               |                |                |
| Clarithromycin  | FALSE           | 1                        | -13.31              | 0.91                             | Sample 105                   |               |               |                | 1              |
| Tobramycin      | FALSE           | 1                        | -38.58              | 0.91                             | Sample 154                   |               |               |                | 1              |
| Glutethimide    | FALSE           | 1                        | -6.73               | 0.81                             | Sample 16                    |               |               |                | 1              |
| Azithromycin    | FALSE           | 0                        | -16.25              | 0.80                             | Sample 105                   |               | 1             |                |                |

|                   |       |   |        |      |            |   |   |   |
|-------------------|-------|---|--------|------|------------|---|---|---|
| Nafcillin Sodium  | TRUE  | 0 | 8.21   | 0.80 | Sample 182 |   | 1 |   |
| Tolazamide        | FALSE | 1 | -2.78  | 0.80 | Sample 139 |   |   | 1 |
| Ampicillin        |       |   |        |      |            |   |   |   |
| Sodium            | TRUE  | 0 | 2.95   | 0.79 | Sample 220 |   | 1 |   |
| Ifosfamide        | TRUE  | 1 | 3.09   | 0.79 | Sample 78  | 1 |   |   |
| Terbutaline       |       |   |        |      |            |   |   |   |
| Sulfate           | TRUE  | 1 | 1.20   | 0.79 | Sample 180 | 1 |   |   |
| Adriamycin        | FALSE | 0 | -25.50 | 0.78 | Sample 146 |   | 1 |   |
| Doxorubicin HCl   | FALSE | 1 | -25.50 | 0.78 | Sample 146 |   |   | 1 |
| Calcifediol       | FALSE | 1 | -18.49 | 0.78 | Sample 103 |   |   | 1 |
| Econazole Nitrate | FALSE | 0 | -13.38 | 0.78 | Sample 191 |   | 1 |   |
| Sulconazole       |       |   |        |      |            |   |   |   |
| Nitrate           | FALSE | 0 | -9.79  | 0.78 | Sample 191 |   | 1 |   |
| Fexofenadine      | FALSE | 0 | -30.23 | 0.78 | Sample 272 |   | 1 |   |
| Methyldopa        | FALSE | 1 | -8.21  | 0.78 | Sample 162 |   |   | 1 |

|                   |       |   |        |      |            |   |   |   |   |
|-------------------|-------|---|--------|------|------------|---|---|---|---|
| Acenocoumarol     | FALSE | 1 | -7.29  | 0.77 | Sample 290 |   |   |   | 1 |
| Epirubicin        | FALSE | 0 | -25.70 | 0.76 | Sample 146 |   |   | 1 |   |
| Fialuridine       | TRUE  | 1 | 3.44   | 0.76 | Sample 120 |   | 1 |   |   |
| Grepafloxacin     | TRUE  | 1 | 3.23   | 0.74 | Sample 64  |   | 1 |   |   |
| Lactose           | FALSE | 0 | -14.06 | 0.73 | Sample 90  |   |   | 1 |   |
| Ethinyl estradiol | TRUE  | 1 | 7.39   | 0.72 | Sample 108 |   | 1 |   |   |
| Prochlorperazine  |       |   |        |      |            |   |   |   |   |
| Maleate           | TRUE  | 1 | 6.07   | 0.72 | Sample 58  |   | 1 |   |   |
| Atomoxetine       | FALSE | 1 | -9.79  | 0.71 | Sample 125 |   |   |   | 1 |
| Iproniazid        | TRUE  | 1 | 3.58   | 0.71 | Sample 150 |   | 1 |   |   |
| Minocycline HCl   | TRUE  | 1 | 12.49  | 0.70 | Sample 86  |   | 1 |   |   |
| sum               |       |   |        |      |            | 9 | 8 | 2 | 9 |
